# Supplementary material
Source: PubMed Central journal article supplement (PMC5376016)
Supplement: ajtr0009-1255-f6.pdf [file ajtr0009-1255-f6.pdf]

Anti-miR-630 action on the radiation-resistance of human glioma

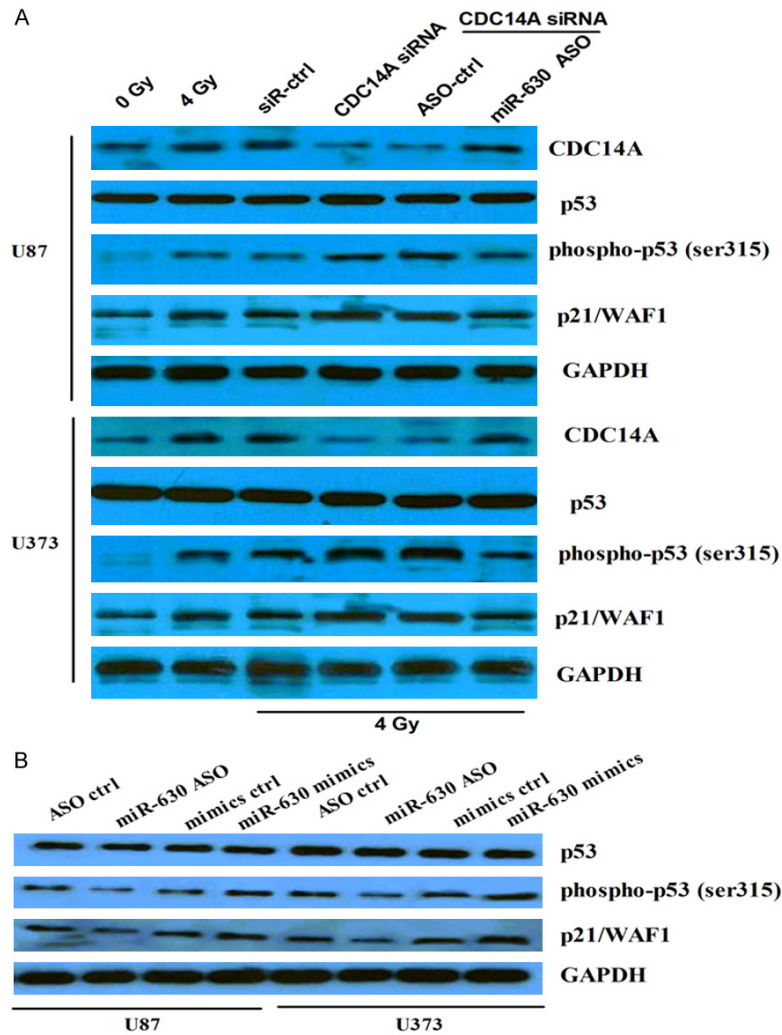

**Supplementary Figure 1.** miR-630 and CDC14A regulate cell cycle-related proteins after irradiation. A. U87 and U373 cells were transfected with either siRNA against CDC14A or siRNA scrambled control or CDC14A siRNA together with miR-630 ASO or controls, and then subjected to western blot after radiation to detect p53 and p21/WAF1 expression as well as the phosphorylation of p53. B. U87 and U373 cells transfected with miR-630 ASO or miR-630 mimics or controls were subjected to western blot to analyze p53 and p21/WAF1 expression as well as p53 phosphorylation. GAPDH was used as an internal control.
